# Supplementary material
Source: publisher figshare collection journal article supplement (https://acs.figshare.com/ndownloader/files/3775150)
Supplement: Supplementary file 1 [file 3775150]

# Boron-Doped Silicon Diatom Frustules as a Photocathode for Water Splitting

*Soundarrajan Chandrasekaran<sup>†</sup>, Thomas J. Macdonald<sup>‡</sup>, Andrea R. Gerson<sup>§</sup>, Thomas Nann<sup>‡\*</sup> and Nicolas H. Voelcker<sup>†\*</sup>*

<sup>†</sup>Mawson Institute, University of South Australia, Mawson Lakes Blvd, Adelaide, SA 5095, Australia.

<sup>‡</sup>Ian Wark Research Institute, University of South Australia, Mawson Lakes Blvd, Adelaide, SA 5095, Australia.

<sup>§</sup>Minerals and Materials Science & Technology, Mawson Institute, University of South Australia, Mawson Lakes, Adelaide, SA 5095, Australia.

\* Thomas Nann, e-mail: [thomas.nann@unisa.edu.au](mailto:thomas.nann@unisa.edu.au).

\* Nicolas H. Voelcker, e-mail: [nico.voelcker@unisa.edu.au](mailto:nico.voelcker@unisa.edu.au).

## Supporting Information

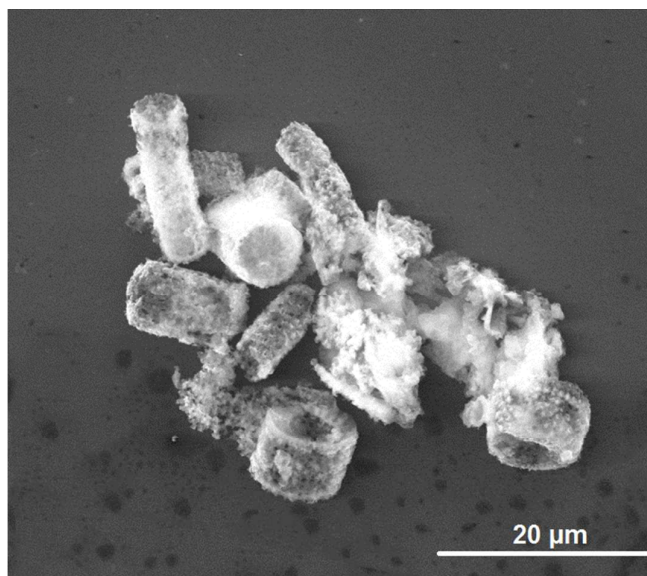

**Figure S1.** SEM image showing the distorted shape of the boron-doped silicon diatom frustules after treatment with HCl and HF.

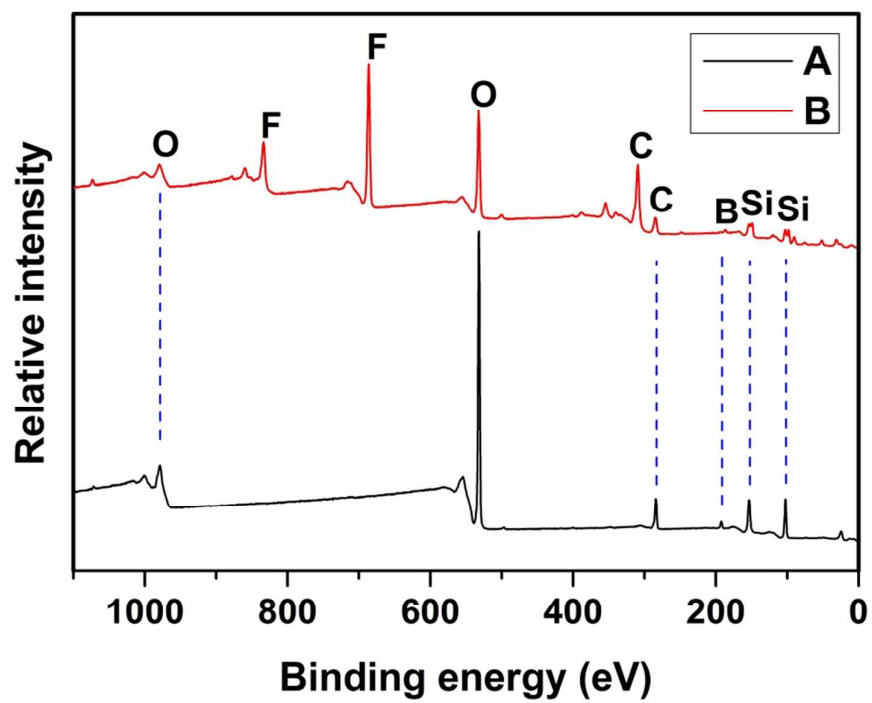

**Figure S2.** XPS survey spectra of boron-doped silica diatom frustules (A) and silicon diatom frustules (B).

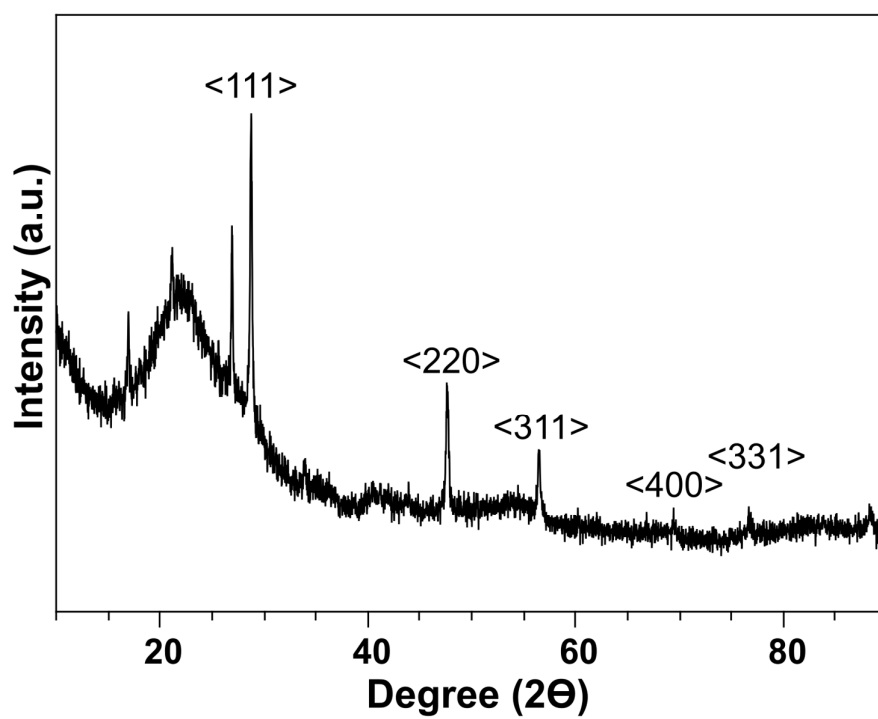

**Figure S3.** XRD spectrum of boron-doped silicon diatom frustules. Strong silicon peaks (JCPDS card number 27-1402) were observed.

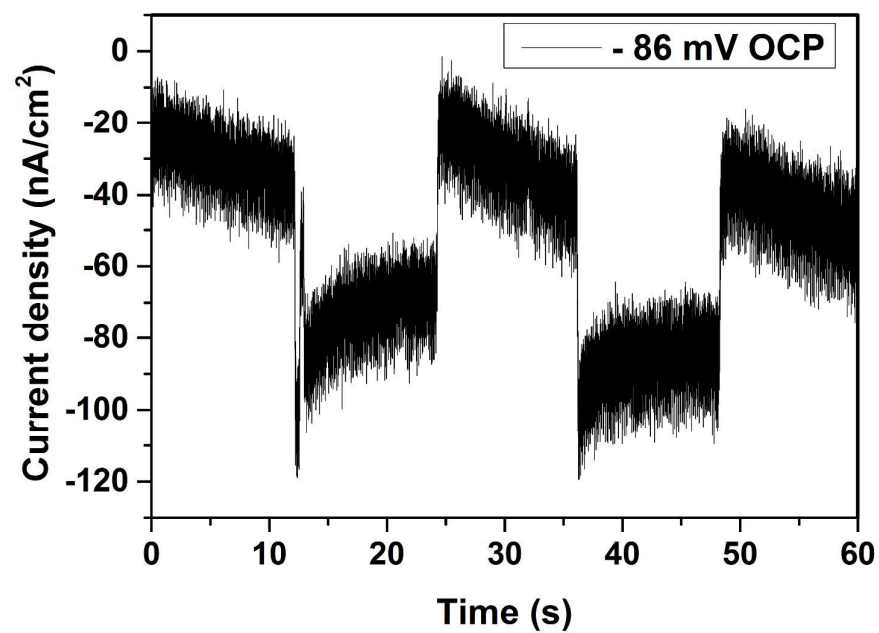

(A)

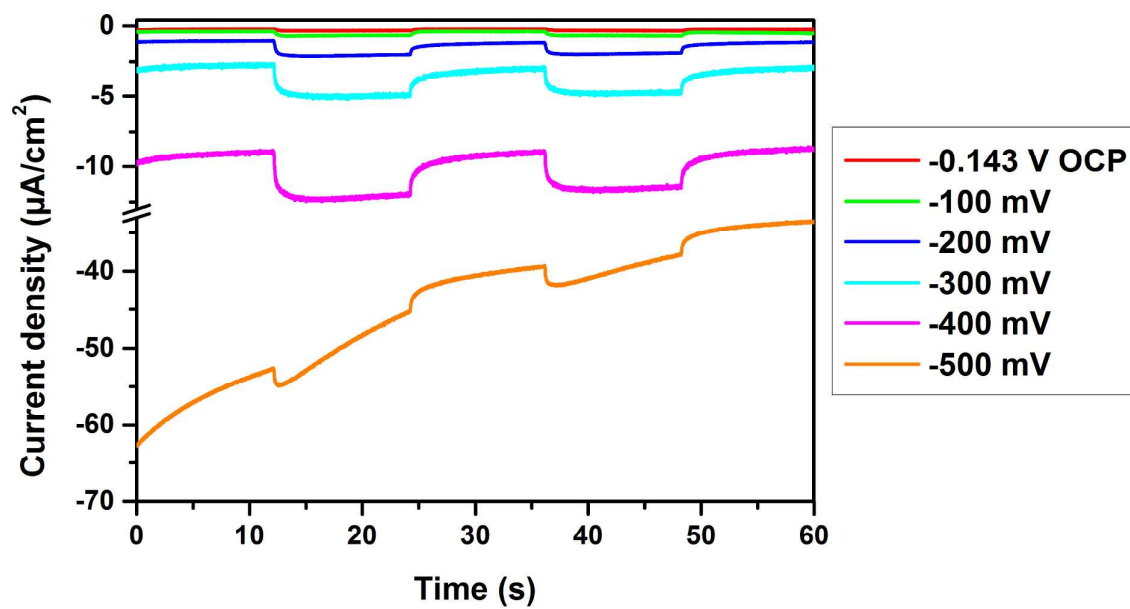

(B)

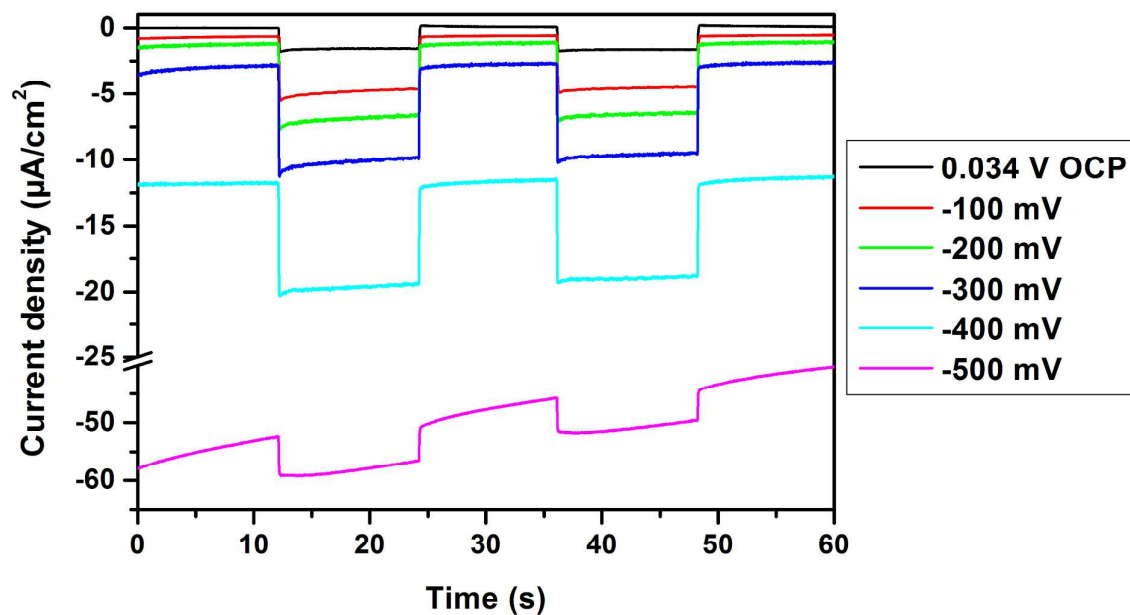

(C)

**Figure S4.** (A) Current density measurement for bare boron-doped silicon diatom frustules carried out in PBS electrolyte at 0 V. (B) Current density measurement for boron-doped silicon diatom frustules coated with InP and catalyst carried out in PBS electrolyte at bias potentials from 0 V to -500 mV in steps of 100 mV. (C) Current density measurement for boron-doped silicon diatom frustules coated with InP and catalyst carried out in 0.1 M  $\text{H}_2\text{SO}_4$  electrolyte at bias potentials from 0 V to -500 mV in steps of 100 mV.

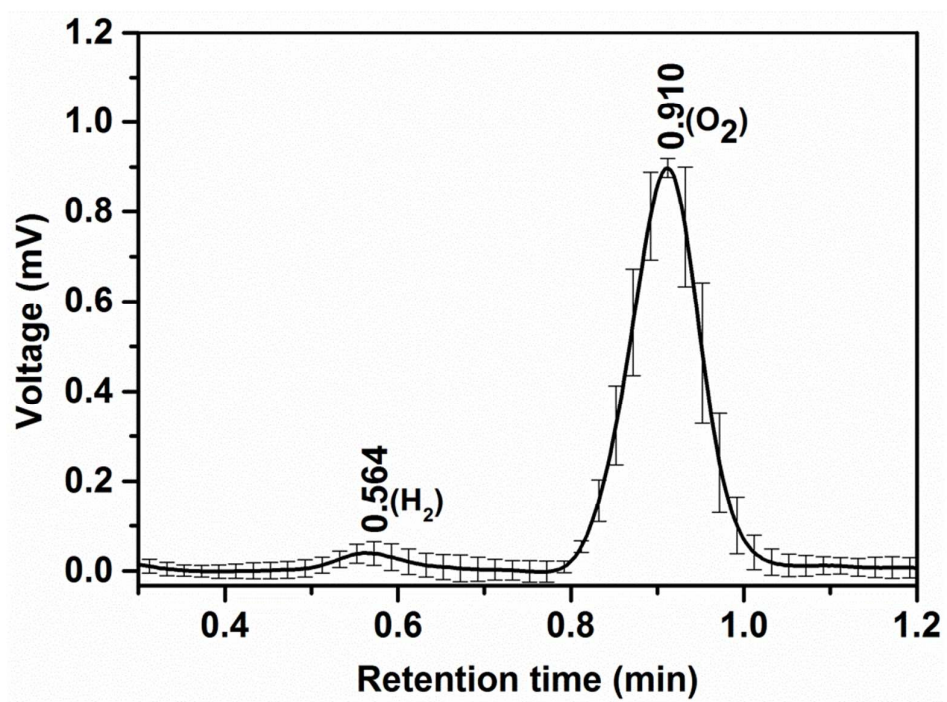

**Figure S5.** GC of  $\text{H}_2$  (200 ppm) standard for 310  $\mu\text{l}$  gas sample.

### Theoretical moles of H<sub>2</sub> produced

According to  $R(H_2) = \frac{I}{nF}$ , a photocurrent of 6  $\mu A$  should produce 0.112  $\mu mol$  of H<sub>2</sub> for 1 h.

$$R(H_2) = \frac{6 \times 10^{-6} A}{2 \frac{\text{mol } e^-}{\text{mol } H_2} \times 96485 \frac{C}{\text{mol } e^-}}$$
$$= 3.1 \times 10^{-5} \times 10^{-6} A \text{ mol } H_2 C^{-1}$$

For 1 h of water splitting reaction =  $3.1 \times 10^{-5} \times 10^{-6} A \text{ mol } H_2 C^{-1} \times 3600 s$

(where Charge (C) = Current (A) x Time (s))

**Amount of H<sub>2</sub> evolution for 1 h = 0.112  $\mu mol$  (or) 112 nmol.**

### Calculation for moles of H<sub>2</sub> produced from gas chromatography

Average area of pure H<sub>2</sub> (310  $\mu l$ , 200 ppm) = 0.00455 mV min

Consider, 99.5% of pure H<sub>2</sub> has 995000 ppm of H<sub>2</sub>.

To convert the average area of pure H<sub>2</sub> (310  $\mu l$ , 200 ppm)

into high pure H<sub>2</sub> =  $\left[ \frac{0.00455 \text{ mV min}}{200 \text{ ppm}} \right] \times 995000 \text{ ppm} = 22.63625 \text{ mV min.}$

Average area of high pure H<sub>2</sub> (310  $\mu l$ ) = 22.63625 mV min.

Area of sample H<sub>2</sub> (310  $\mu l$ ) after 1 h = 0.00655 mV min

From the areas of pure and sample H<sub>2</sub>, the H<sub>2</sub> evolution is calculated based on the formula from Zhang *et al.*<sup>1</sup>

$$\text{Amount of } H_2 \text{ evolution} = \left[ \frac{0.00655 \text{ mV min}}{(22.63625 - 0.00655) \text{ mV min}} \right] \times 1 \text{ ml} \times \frac{\text{mol}}{22.4 \times 1000 \text{ ml}}$$

(where 1 ml is the volume of the headspace.)

**Amount of H<sub>2</sub> evolution for 1 h = 12.9 nmol.**



Reference:

1. Zhang, K.; Jing, D.; Xing, C.; Guo, L. Significantly Improved Photocatalytic Hydrogen Production Activity over Photocatalysts Prepared by a Novel Thermal Sulfuration Method. *Int. J. Hydrogen Energy* **2007**, *32*, 4685-4691.
